# Supplementary material
Source: MDPI journal article supplement (https://www.mdpi.com/2075-163X/13/3/433)
Supplement: s1 [file s1]

## Article

# A Toxicological Study of the Respirable Coal Mine Dust: Assessment of Different Dust Sources within the Same Mine

Milton Das <sup>1</sup>, Vanessa Salinas <sup>2</sup>, Jason LeBoeuf <sup>1</sup>, Rifat Khan <sup>1</sup>, Quiteria Jacquez <sup>3</sup>, Alexandra Camacho <sup>3</sup>, Mark Hovingh <sup>4</sup>, Katherine Zychowski <sup>3</sup>, Mohammad Rezaee <sup>4</sup>, Pedram Roghanchi <sup>2</sup> and Gayan Rubasinghege <sup>1,\*</sup>

- <sup>1</sup> Department of Chemistry, New Mexico Institute of Mining and Technology, Socorro, NM, USA  
<sup>2</sup> Department of Mineral Engineering, New Mexico Institute of Mining and Technology, Socorro, NM, USA  
<sup>3</sup> College of Nursing, University of New Mexico-Health Sciences Center, Albuquerque, NM, USA  
<sup>4</sup> Department of Energy and Mineral Engineering, The Pennsylvania State University, University Park, PA, USA  
\* Correspondence: [gayan.rubasinghege@nmt.edu](mailto:gayan.rubasinghege@nmt.edu) (GR); Tel.: +1 575 835 5129

**Citation:** Das, M.; Salinas, V.; LeBoeuf, J.; Khan, R.; Jacquez, Q.; Camacho, A.; Hovingh, M.; Zychowski, K.; Rezaee, M.; Roghanchi, P.; et al. A Toxicological Study of the Respirable Coal Mine Dust: Assessment of Different Dust Sources within the Same Mine. *Minerals* 2023, 13, 433. <https://doi.org/10.3390/min13030433>

Academic Editor: Fernando Rocha and Carla Candeias

Received: 28 February 2023

Revised: 14 March 2023

Accepted: 17 March 2023

Published: 18 March 2023

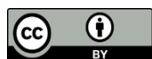

**Copyright:** © 2023 by the authors.

Licensee MDPI, Basel, Switzerland.

This article is an open access article distributed under the terms and conditions of the Creative Commons Attribution (CC BY) license (<https://creativecommons.org/licenses/by/4.0/>).

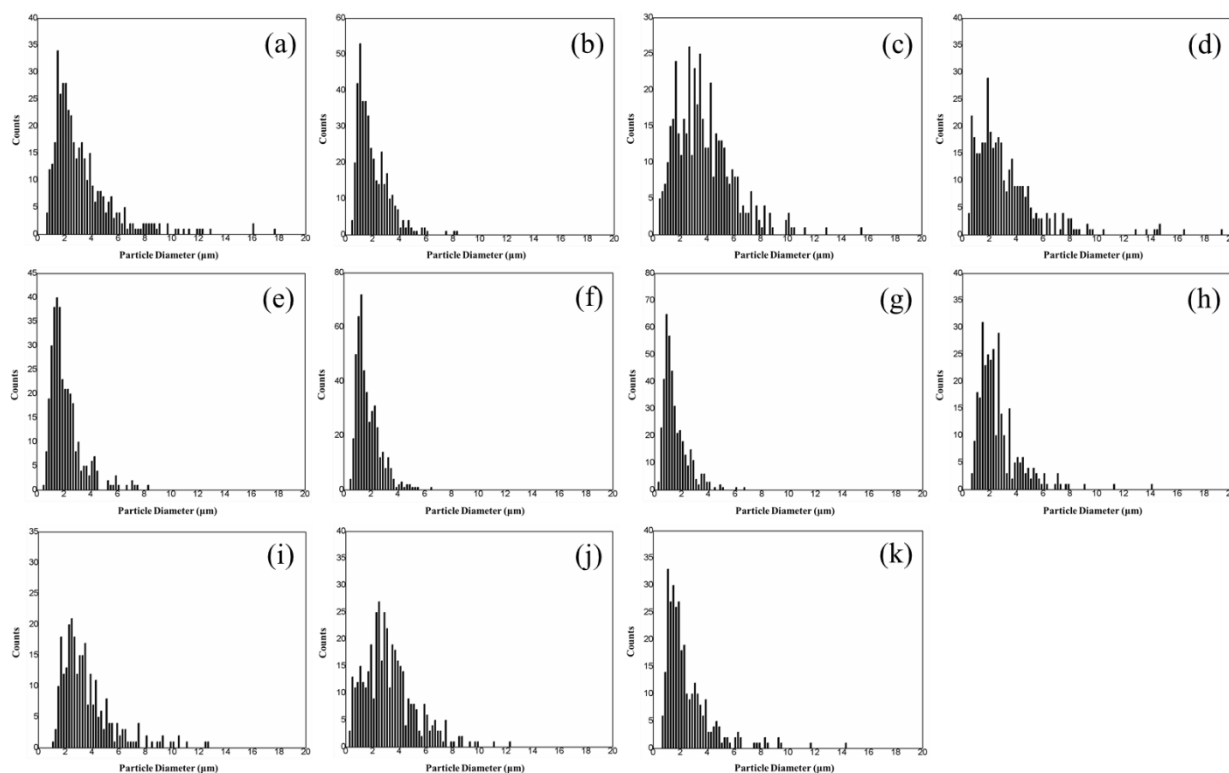

Figure S1: Particle size distribution, prepared from the SEM images, for samples (a) Mine 1\_Coal (b) Mine 1\_Floor (c) Mine 1\_RD (d) Mine 1\_Roof (e) Mine 2\_Coal (f) Mine 2\_Floor (g) Mine 2\_Roof (h) Mine 3\_Coal (i) Mine 3\_Floor (j) Mine 3\_RD (k) Mine 3\_Roof.

Table S1: BET surface area measurements for the coal dust samples.

| Samples      | Average Surface area (m <sup>2</sup> /g) |
|--------------|------------------------------------------|
| Mine 1_Coal  | 6.91 ± 0.15                              |
| Mine 1_Floor | 10.01 ± 0.17                             |
| Mine 1_RD    | 4.72 ± 0.03                              |
| Mine 1_Roof  | 18.59 ± 0.14                             |
| Mine 2_Coal  | 8.46 ± 0.15                              |
| Mine 2_Floor | 38.46 ± 0.19                             |
| Mine 2_Roof  | 39.85 ± 0.26                             |
| Mine 3_Coal  | 6.89 ± 0.14                              |
| Mine 3_Floor | 37.25 ± 0.09                             |
| Mine 3_RD    | 4.10 ± 0.05                              |
| Mine 3_Roof  | 14.76 ± 0.04                             |

Table S2: FTIR peak assignments.

| Experimental Peaks at cm <sup>-1</sup> | Standard Peaks at cm <sup>-1</sup> | Peak assignments                           |
|----------------------------------------|------------------------------------|--------------------------------------------|
| 779 & 799                              | 800 & 780                          | Silica                                     |
| 713                                    | 718                                | N-H bending                                |
| 878                                    | 878                                | C-O bonds in carbonates                    |
| 915                                    | 915                                | Kaolinite                                  |
| 950-1150                               | -                                  | Si=O, Si-O-Si, Si-O-C, C-O-C               |
| 1445                                   | 1445                               | Antisymmetric –CH <sub>3</sub> deformation |
| 1415                                   | 1412                               | C-N/N-H for nitrates                       |

Table S3: Elemental composition of samples.

| Samples      | % elemental concentration |        |       |       |       |       |       |       |       |
|--------------|---------------------------|--------|-------|-------|-------|-------|-------|-------|-------|
|              | Al                        | Si     | Cr    | Mn    | Fe    | Cu    | Sr    | Ba    | Pb    |
| Mine 1_Coal  | 1.307                     | 5.276  | 0.002 | 0.000 | 0.121 | 0.002 | 0.004 | 0.022 | 0.004 |
| Mine 1_Floor | 0.793                     | 27.233 | 0.004 | 0.001 | 0.201 | 0.001 | 0.002 | 0.023 | 0.001 |
| Mine 1_RD    | 0.020                     | 1.457  | 0.000 | 0.039 | 0.177 | 0.001 | 0.004 | 0.001 | 0.013 |
| Mine 1_Roof  | 0.802                     | 25.434 | 0.006 | 0.072 | 2.064 | 0.003 | 0.008 | 0.030 | 0.002 |
| Mine 2_Coal  | 0.114                     | 0.507  | 0.001 | 0.000 | 0.190 | 0.001 | 0.010 | 0.003 | 0.005 |
| Mine 2_Floor | 0.481                     | 24.997 | 0.009 | 0.016 | 1.687 | 0.004 | 0.005 | 0.034 | 0.002 |
| Mine 2_Roof  | 0.646                     | 23.786 | 0.009 | 0.006 | 1.105 | 0.005 | 0.026 | 0.044 | 0.003 |
| Mine 3_Coal  | 1.115                     | 4.331  | 0.004 | 0.001 | 0.677 | 0.002 | 0.001 | 0.005 | 0.024 |
| Mine 3_Floor | 0.771                     | 23.469 | 0.012 | 0.004 | 1.893 | 0.008 | 0.035 | 0.044 | 0.007 |
| Mine 3_RD    | 0.060                     | 1.614  | 0.000 | 0.006 | 0.158 | 0.000 | 0.009 | 0.001 | 0.000 |
| Mine 3_Roof  | 0.693                     | 17.016 | 0.008 | 0.018 | 9.364 | 0.005 | 0.008 | 0.034 | 0.022 |
| SRM_CLB 1    | 0.633                     | 1.227  | 0.001 | 0.001 | 0.810 | 0.001 | 0.006 | 0.004 | 0.001 |

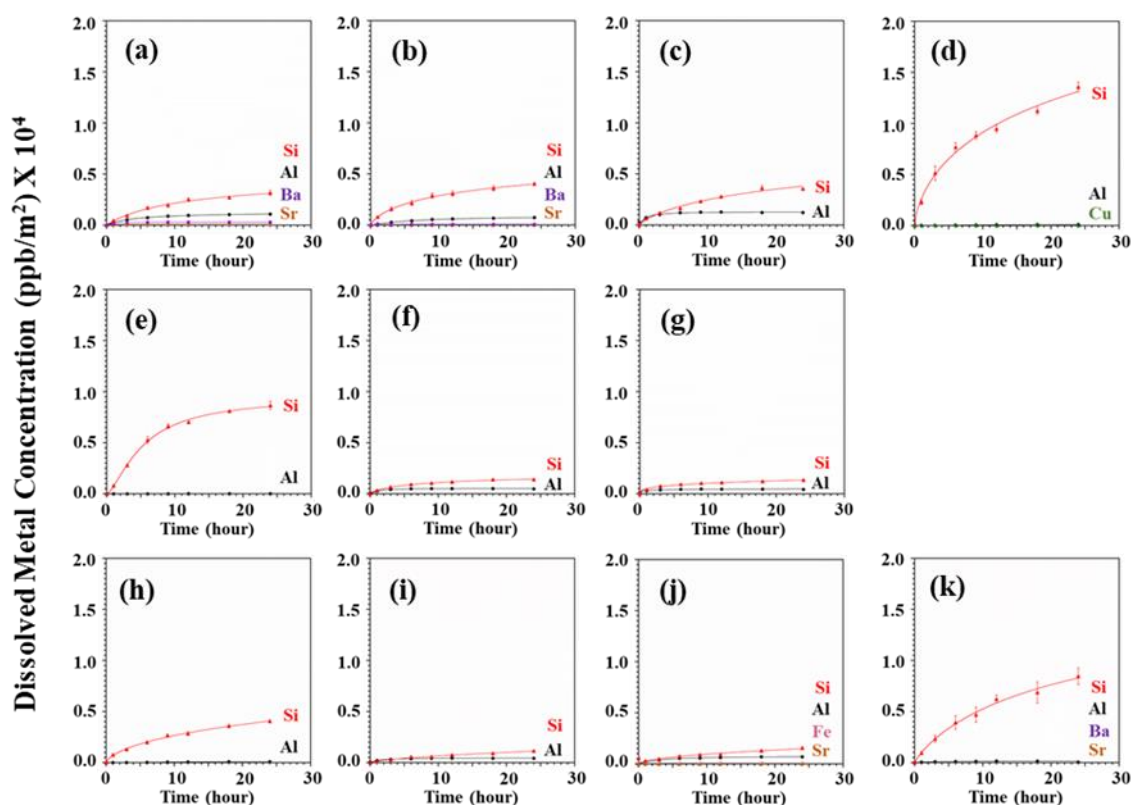

Figure S2: Surface area normalized dissolution of elements in GS from samples (a) Mine 1\_Coal (b) Mine 1\_Floor (c) Mine 1\_Roof (d) Mine 1\_RD (e) Mine 2\_Coal (f) Mine 2\_Floor (g) Mine 2\_Roof (h) Mine 3\_Coal (i) Mine 3\_Floor (j) Mine 3\_Roof (k) Mine 3\_RD.

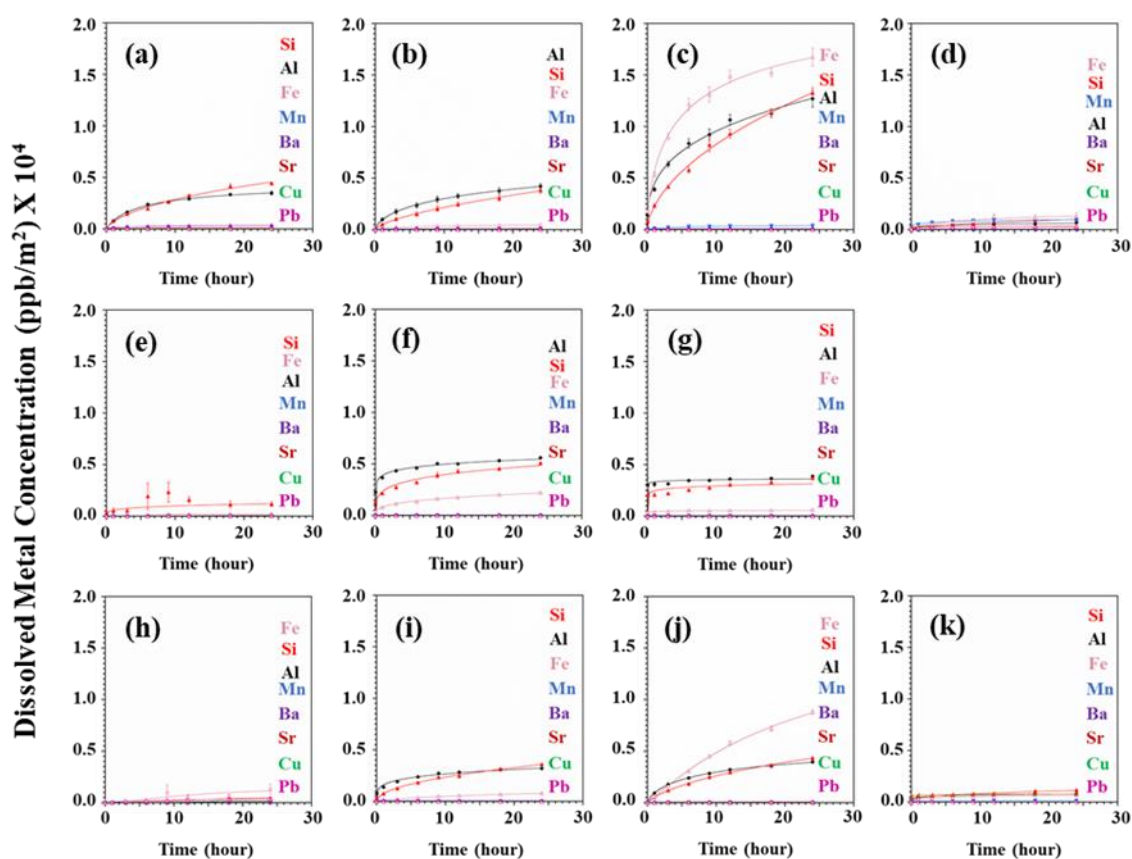

Figure S3: Surface area normalized dissolution of elements in ALF from samples (a) Mine 1\_Coal (b) Mine 1\_Floor (c) Mine 1\_Roof (d) Mine 1\_RD (e) Mine 2\_Coal (f) Mine 2\_Floor (g) Mine 2\_Roof (h) Mine 3\_Coal (i) Mine 3\_Floor (j) Mine 3\_Roof (k) Mine 3\_RD.

Table S4: Surface area normalized dissolved of metals in GS and ALF following 24 hours dissolution experiments.

| Samples      | Al    |      | Si    |       | Mn  |    | Fe    |    | Cu  |    | Sr  |     | Ba  |     | Pb  |    |
|--------------|-------|------|-------|-------|-----|----|-------|----|-----|----|-----|-----|-----|-----|-----|----|
|              | ALF   | GS   | ALF   | GS    | ALF | GS | ALF   | GS | ALF | GS | ALF | GS  | ALF | GS  | ALF | GS |
| Mine 1_Coal  | 3496  | 1084 | 4432  | 3165  | 3   | -  | 433   | -  | 7   | -  | 106 | 142 | 302 | 297 | 39  | -  |
| Mine 1_Floor | 4206  | 739  | 3822  | 4028  | 5   | -  | 463   | -  | 17  | -  | 54  | 39  | 140 | 56  | 3   | -  |
| Mine 1_RD    | 678   | 117  | 994   | 13580 | 921 | -  | 1326  | -  | 36  | 27 | 273 | -   | 69  | -   | 310 | -  |
| Mine 1_Roof  | 12706 | 1232 | 13258 | 3538  | 397 | -  | 16750 | -  | 9   | -  | 47  | -   | 111 | -   | 6   | -  |
| Mine 2_Coal  | 31    | 15   | 1183  | 8658  | 3   | -  | 258   | -  | 83  | -  | 37  | -   | 32  | -   | 53  | -  |
| Mine 2_Floor | 5621  | 487  | 5091  | 1412  | 17  | -  | 2227  | -  | 4   | -  | 8   | -   | 56  | -   | 3   | -  |
| Mine 2_Roof  | 3881  | 424  | 3702  | 1345  | 2   | -  | 626   | -  | 7   | -  | 13  | -   | 58  | -   | 3   | -  |
| Mine 3_Coal  | 178   | 97   | 466   | 4058  | 4   | -  | 1331  | -  | 114 | -  | 30  | -   | 22  | -   | 378 | -  |
| Mine 3_Floor | 3207  | 436  | 3592  | 1151  | 3   | -  | 787   | -  | 10  | -  | 21  | -   | 58  | -   | 8   | -  |
| Mine 3_RD    | 800   | 58   | 1163  | 8463  | 139 | -  | 670   | -  | 36  | -  | 758 | -   | 8   | -   | 8   | -  |
| Mine 3_Roof  | 3966  | 696  | 4343  | 1564  | 25  | -  | 8793  | 83 | 7   | -  | 15  | 11  | 67  | -   | 71  | -  |
